# Supplementary material for: High-performance top-gated monolayer SnS2 field-effect transistors and their integrated logic circuits
Source: Royal Society of Chemistry journal article supplement (doi:10.1039/c3nr01899g), 2013-01-01
Supplement: c3nr01899g.pdf [file c3nr01899g.pdf]

Supporting Information to:

**High-performance Top-gated Monolayer SnS<sub>2</sub> Field-effect Transistors and Their  
Integrated Logic Circuits**

H. S. Song<sup>1,2</sup>, S. L. Li<sup>1\*</sup>, L. Gao<sup>2</sup>, Y. Xu<sup>1</sup>, K. Ueno<sup>3</sup>, J. Tang<sup>2\*</sup>, Y. B. Cheng<sup>2,4</sup>,

K. Tsukagoshi<sup>1\*</sup>

*1. International Center for Materials Nanoarchitectonics (WPI-MANA), National  
Institute for Materials Science (NIMS), Tsukuba, Ibaraki 305-0044, Japan*

*2. Wuhan National Laboratory for Optoelectronics (WNLO) and School of Optical  
and Electronic Information, Huazhong University of Science and Technology (HUST),  
Wuhan 430074, P. R. China*

*3. Department of Chemistry, Graduate School of Science and Engineering, Saitama  
University, Saitama 338-8570, Japan*

*4. Department of Materials Engineering, Monash University, Melbourne, Victoria,  
3800, Australia*

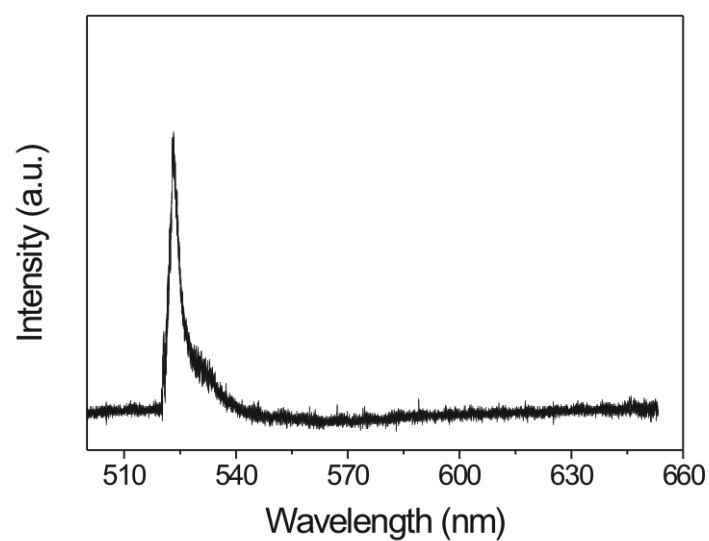

**Figure S1.** Micro-photoluminescence of single layer SnS<sub>2</sub> flake fabricated for TG-FET.

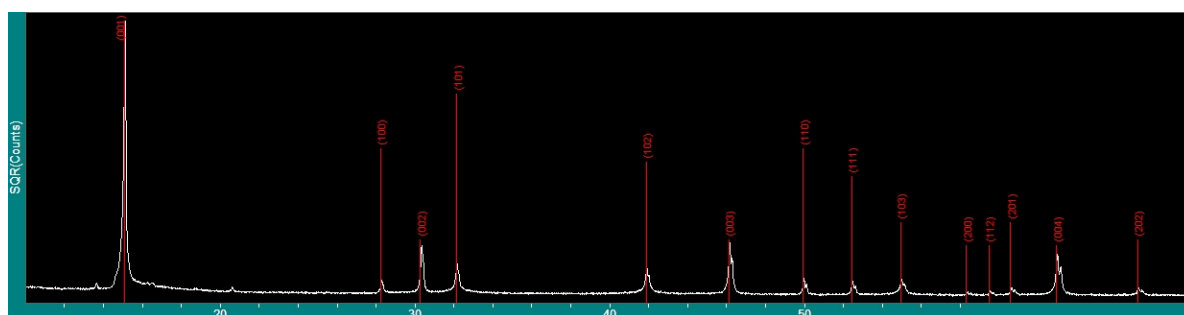

**Figure S2.** Powder XRD of SnS<sub>2</sub> bulks, red lines denote from the standard card and the white peaks correspond to XRD data. The exfoliated source demonstrates pure hexagonal SnS<sub>2</sub> with JCPDS NO.83-1706.

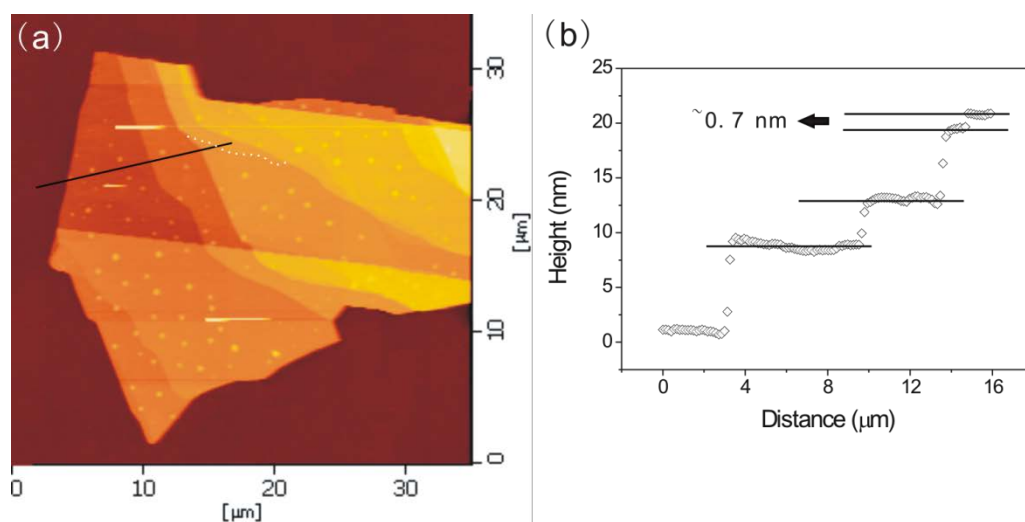

**Fig.S3 (a,b)** AFM image of multiple layer SnS<sub>2</sub> flake and its height profile along the black line. The white dotted line shows the boundary of two neighbor layers and the height difference is  $\sim 0.7$  nm. The 0.7 nm scanning demonstrate that our AFM instruments can identify monolayer scanning.

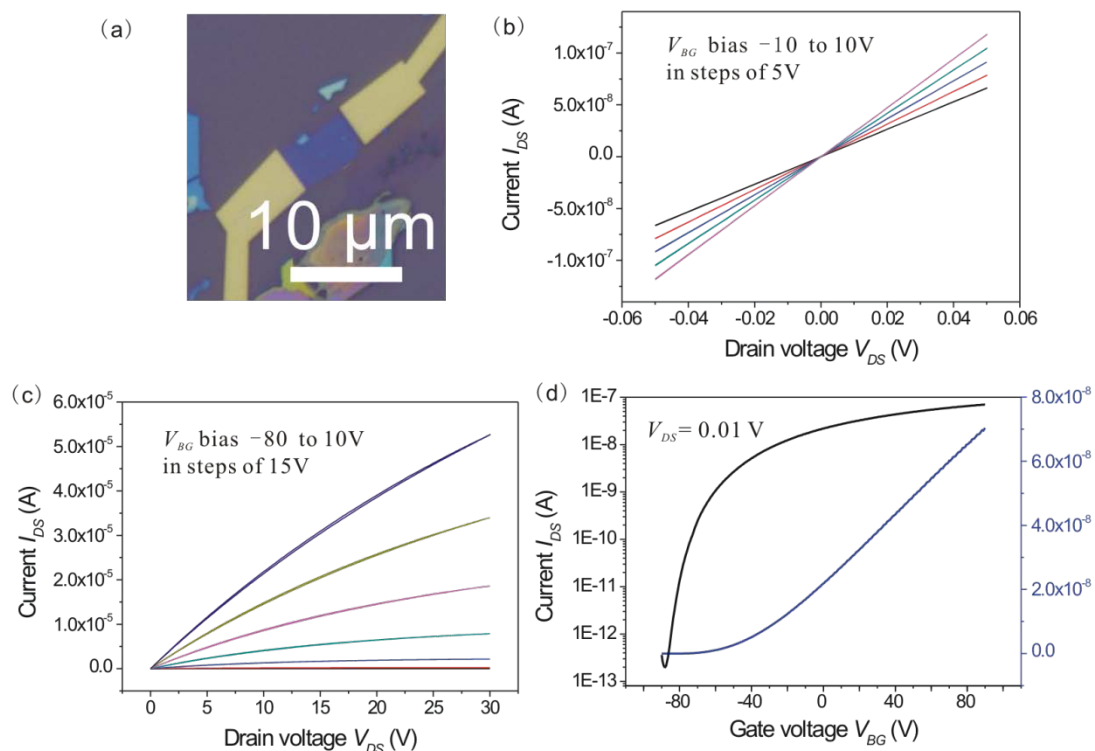

Figure S4. BG-FET performances with bare top surface, the carrier mobility is  $\sim 10$   $\text{cm}^2/\text{Vs}$ .

For the calculation to the BG-FET mobility: The BG-FET was measured in standard back-gated FET structure utilizing 285 nm  $\text{SiO}_2$  covering layer with bare  $\text{SnS}_2$  flake top surface as the channel. For the calculation of mobility, we utilize the linear working zone of FET as

$$\mu_{BG} = g_m \times \frac{L}{W} \times \frac{1}{C_i} \times \frac{1}{V_{DS}}, \text{ while the transconductance } g_m = \frac{dI_{DS}}{dV_{BG}} \text{ was extracted from Fig.}$$

S2d,  $g_m = 8 \times 10^{-10}$  A/V; the capacitance per unit area of  $\text{SiO}_2$ ,  $C_i = \epsilon_0 \epsilon_r / d = 8.85 \times 10^{-12} \text{F/m} \times 3.9 / (285 \times 10^{-9} \text{m}) = 1.21 \times 10^{-8} \text{F/cm}^2$ ; The ratio of channel length to width is  $\sim 5/3$ . Substituting all the

$$\text{above data, we can get } \mu_{BG} = g_m \times \frac{L}{W} \times \frac{1}{C_i} \times \frac{1}{V_{DS}} = 8 \times 10^{-10} \times \frac{5}{3} \times \frac{1}{1.21 \times 10^{-8}} \times 100 \text{ cm}^2/\text{Vs}$$

$\sim 10$   $\text{cm}^2/\text{Vs}$ .

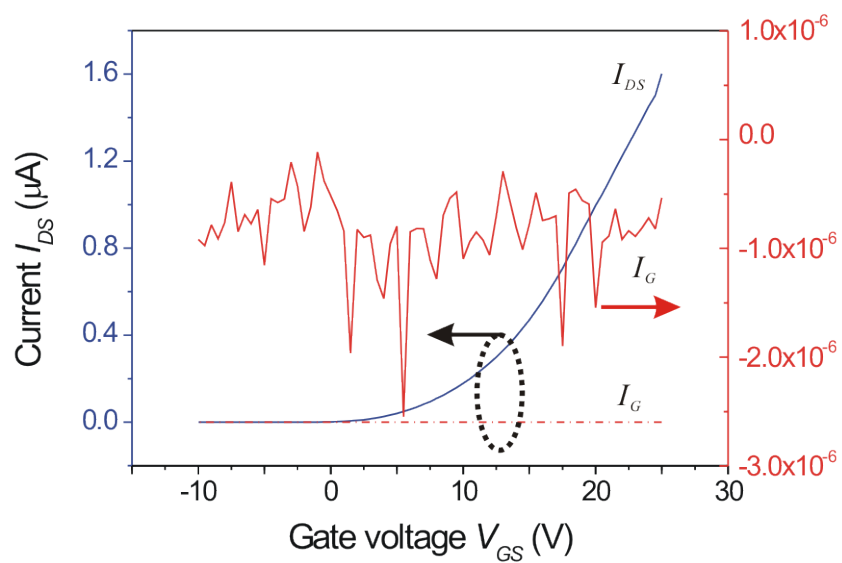

**Figure S5.** Leakage current ( $I_G$ ) stands in the order of  $10^{-14}$ - $10^{-12}$  ampere during our measurement.
